# Supplementary material
Source: Springer Nature journal article supplement (https://www.springermedizin.de/resource/supplementary/12916_2013_1090_MOESM2_ESM.pdf/9598400)

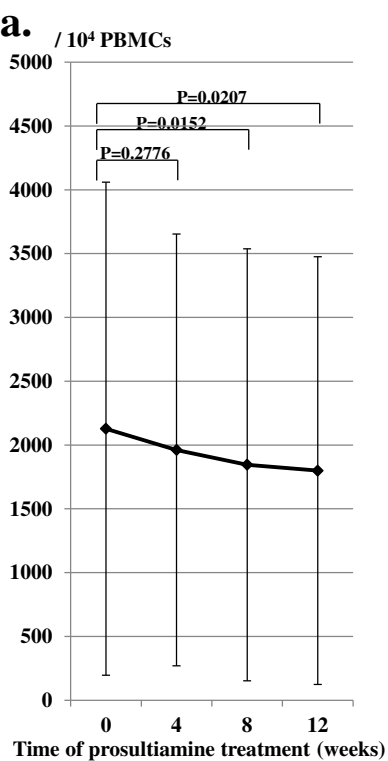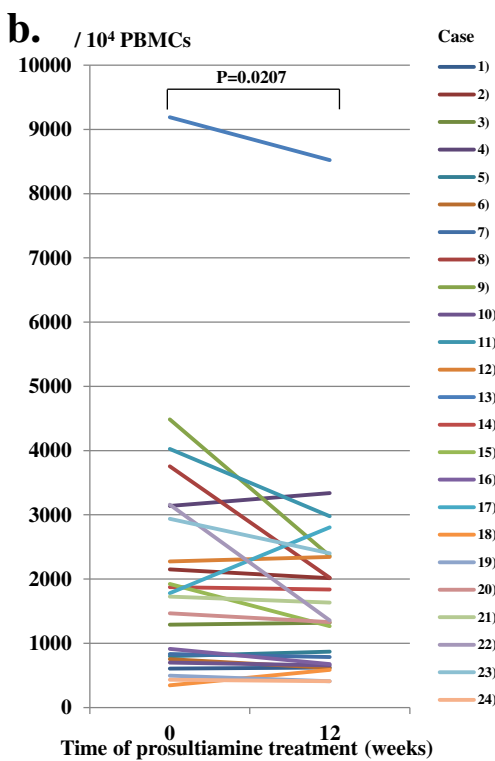

Supplement: MOESM2 [file 9598400]
